# Supplementary material for: Ethanol promotes alcohol-related colorectal cancer metastasis via the TGF-β/RUNX3/Snail axis by inducing TGF-β1 upregulation and RUNX3 cytoplasmic mislocalization
Source: PubMed Central journal article supplement — eBioMedicine. 2019 Nov 19;50:224–37. doi: 10.1016/j.ebiom.2019.11.011 (PMC6921366; doi:10.1016/j.ebiom.2019.11.011), 2019-11-19
Supplement: mmc3.pdf [file mmc3.pdf]

**Supplementary Table S1.** Correlation of subject characteristics and alcohol consumption

| Characteristics                      | Total<br><i>n</i> | CRC Patients               |                          | <i>P</i> value <sup>1</sup> |
|--------------------------------------|-------------------|----------------------------|--------------------------|-----------------------------|
|                                      |                   | Abstainers<br><i>n</i> (%) | Drinkers<br><i>n</i> (%) |                             |
| <b>Sex</b>                           |                   |                            |                          | <b>&lt; 0.001</b>           |
| Female                               | 74                | 67(90.5)                   | 7(9.5)                   |                             |
| Male                                 | 123               | 23(18.7)                   | 100(81.3)                |                             |
| <b>Age at diagnosis, y</b>           |                   |                            |                          | <b>0.579</b>                |
| < 50                                 | 27                | 11(40.7)                   | 16(59.3)                 |                             |
| ≥ 50                                 | 170               | 79(46.5)                   | 91(53.5)                 |                             |
| <b>BMI<sup>2</sup></b>               |                   |                            |                          | <b>0.638</b>                |
| < 18.5                               | 12                | 7(58.3)                    | 5(41.7)                  |                             |
| 18.5 ≥, ≤ 24.9                       | 118               | 52(44.1)                   | 66(55.9)                 |                             |
| > 25                                 | 58                | 26(44.8)                   | 32(55.2)                 |                             |
| <b>Tumor location<sup>3,4</sup></b>  |                   |                            |                          | <b>0.019</b>                |
| Left colon                           | 74                | 46(62.2)                   | 28(37.8)                 |                             |
| Right colon                          | 87                | 38(43.7)                   | 49(56.3)                 |                             |
| <b>T classification<sup>5</sup></b>  |                   |                            |                          | <b>0.796</b>                |
| T1+T2                                | 12                | 6(50.0)                    | 6(50.0)                  |                             |
| T3+T4                                | 182               | 84(46.2)                   | 98(53.8)                 |                             |
| <b>N classification</b>              |                   |                            |                          | <b>&lt; 0.001</b>           |
| N0                                   | 92                | 57(62.0)                   | 35(38.0)                 |                             |
| N1+N2                                | 105               | 33(31.4)                   | 72(68.6)                 |                             |
| <b>M classification<sup>6</sup></b>  |                   |                            |                          | <b>0.660</b>                |
| M0                                   | 154               | 83(53.9)                   | 71(46.1)                 |                             |
| M1                                   | 3                 | 2(66.7)                    | 1(33.3)                  |                             |
| <b>Flushing syndrome<sup>7</sup></b> |                   |                            |                          | <b>&lt; 0.001</b>           |
| No                                   | 91                | 26(28.6)                   | 65(71.4)                 |                             |
| Yes                                  | 106               | 64(60.4)                   | 42(39.6)                 |                             |
| <b>Smoking</b>                       |                   |                            |                          | <b>&lt; 0.001</b>           |
| Non-smokers                          | 103               | 66(64.1)                   | 37(35.9)                 |                             |
| Smokers                              | 94                | 24(25.5)                   | 70(74.5)                 |                             |

<sup>1</sup>Pearson  $\chi^2$  test of independence between covariables and lifetime alcohol consumption.

<sup>2</sup>Excludes 9 participant with missing weight and/or height data.

<sup>3</sup>The left colon means the transverse, descending, and sigmoid colon; and the right colon means the caecum and ascending colon.

<sup>4</sup>Excludes 36 participant with missing location data.

<sup>5</sup>Excludes 3 participant with missing location data.

<sup>6</sup>Excludes 40 participant with missing M classification data.

<sup>7</sup>Flushing syndrome refers to an adverse reaction after drinking, which occurs in people who are acetaldehyde intolerant.

**Supplementary Table S2.** RT-PCR primer sequences for human genes

| <b>Gene</b>                    | <b>Forward primer</b>        | <b>Reverse primer</b>          | <b>Product length</b> |
|--------------------------------|------------------------------|--------------------------------|-----------------------|
| <b>TGF-<math>\beta</math>1</b> | <b>CTGTCCAACATGATCGTGCG</b>  | <b>TGACACAGAGATCCGCAGTC</b>    | <b>195bp</b>          |
| <b>GAPDH</b>                   | <b>GGAGCGAGATCCCTCCAAAAT</b> | <b>GGCTGTTGTCATACTTCTCATGG</b> | <b>197bp</b>          |
